# Supplementary material for: Synchronous activity patterns in the dentate gyrus during immobility
Source: eLife. 2021 Mar 12;10:e65786. doi: 10.7554/eLife.65786 (PMC7987346; doi:10.7554/eLife.65786)
Supplement: Supplementary file 1. [file elife-65786-supp1.xlsx]

## Sheet: Figure 1
E, repeated measrues ANOVA Test on network occurence & Frequencies, run vs rest
NE occurences
	SumSq	DF	MeanSq	F	pValue	n (mice)	sessions
run vs rest	26953.7	1	26953.7	71.7949	1.65474e-07	9	3
between mice	15134.7	8	1891.84	5.03917	0.0024843
error	6382.25	17	375.426	1	0.5
NE frequencies
	SumSq	DF	MeanSq	F	pValue	n (mice)	sessions
run vs rest	71.7917	1	71.7917	42.1203	5.54861e-06	9	3
between mice	81.0514	8	10.1314	5.94412	0.00101697
error	28.9756	17	1.70444	1	0.5
Normalized NE occurences
	SumSq	DF	MeanSq	F	pValue	n (mice)	sessions
run vs rest	2682.12	1	2682.12	90.5883	3.17903e-08	9	3
between mice	2443.99	8	305.499	10.3182	3.4796e-05
error	503.333	17	29.6078	1	0.5
Normalized NE frequencies
	SumSq	DF	MeanSq	F	pValue	n (mice)	sessions
run vs rest	117.285	1	117.285	48.7347	2.21412e-06	9	3
between mice	139.13	8	17.3912	7.22647	0.000328358
error	40.9121	17	2.4066	1	0.5

## Sheet: Fig 1 - Suppl 1
Anova for differences in total distance
Source	Sum Sq.	d.f.	Singular?	Mean Sq.	F	Prob>F	n
base vs cue	2658.12	2	0	1329.06	1.25986	0.306346	13
Error	20043.7	19	0	1054.93
Total	22701.8	21	0
Anova for differences in mean speed
Source	Sum Sq.	d.f.	Singular?	Mean Sq.	F	Prob>F	n
base vs cue	17.637	2	0	8.81848	0.559046	0.580878	13
Error	299.709	19	0	15.7742
Total	317.346	21	0
Anova for fractions of running time
Source	Sum Sq.	d.f.	Singular?	Mean Sq.	F	Prob>F	n
base vs cue	0.0178015	2	0	0.00890077	0.40713	0.671228	13
Error	0.415383	19	0	0.0218623
Total	0.433185	21	0

## Sheet: Fig.1 - Suppl 2
C, Repeated Measrue ANOVA event frequency
SumSq	DF	MeanSq	F	pValue
2.11047	1	2.11047	28.0603	4.90185e-05
2.66107	8	0.332634	4.42261	0.00421453
D, Repeated Measrue ANOVA event Amplitude
SumSq	DF	MeanSq	F	pValue
0.0333065	1	0.0333065	20.548	0.000257569
0.0304556	8	0.00380695	2.34865	0.063173

## Sheet: Fig.1 - Suppl 3
A, Normalized NE frequencies
	SumSq	DF	MeanSq	F	pValue	n (mice)	sessions
run vs rest	117.285	1	117.285	48.7347	2.21412e-06	9	3
between mice	139.13	8	17.3912	7.22647	0.000328358
error	40.9121	17	2.4066	1	0.5

## Sheet: Figure 2
C, Anova Bulk input Df/f
Source	SS	df	MS	F	Prob>F	mice
Columns	0.147697	1	0.147697	7.68002	0.0323674	4
Error	0.115388	6	0.0192314
Total	0.263086	7
D, Anova Bulk input variance
Source	SS	df	MS	F	Prob>F	mice
Columns	0.00553389	1	0.00553389	7.07058	0.0375713	4
Error	0.00469598	6	0.000782664
Total	0.0102299	7
E, individual x-correlations of MPP and GC signals
	resting				run
Mouse	F	p	max	lag/s	F	p	max	lag/s
M224	16.7058	6.94764e-11	0.108249	0	0.799586	0.313811	0.198166	-3.99003
	2.14684	0.121577	0.0931339	0	3.66798	0.0471013	0.188246	0
	17.379	2.65614e-05	0.146027	-0.0665038	1.46727	0.185302	0.210403	0.133008
M227	20.5873	9.67775e-10	0.129967	0.133519	0.998076	0.28243	0.0359626	0.200279
	42.6507	4.6193e-17	0.339535	0.0667591	0.0652926	0.6561	0.00342357	2.20305
	30.5393	4.6193e-17	0.164585	0.0667688	0.30529	0.478297	0.0349799	0
M234	27.4302	4.6193e-17	0.0683911	-0.0667697
	10.5066	0.00106112	0.0636147	1.73594	16.2617	8.98145e-08	0.0696649	2.13654
	23.0983	5.29253e-15	0.0702298	-0.0667728	14.5343	1.12365e-13	0.209157	1.86964
G, apmlitudes of deconvolved MPP events, kruskal wallis test
	SumSq	DF	MeanSq	F	pValue
Run vs rest	1.23969e+10	1	1.23969e+10	195.636	1.87139e-44
Error	1.73489e+12	27573	6.292e+07
Total	1747291308900	27574
H, all events run vs rest
	SumSq	DF	MeanSq	F	pValue
Base vs Cue	17.5166	1	17.5166	255.03	3.82837e-06
between mice	0.254821	2	0.127411	1.85501	0.235935
error	0.412107	6	0.0686845	1	0.5
I, 2 sigma events run vs rest
	SumSq	DF	MeanSq	F	pValue
Base vs Cue	0.00646165	1	0.00646165	27.3057	0.00196574
between mice	0.00132233	2	0.000661164	2.79395	0.138816
error	0.00141985	6	0.000236641	1	0.5

## Sheet: Figure 3
D, Pupil Size - Repeated Measures Anova
SumSq	DF	MeanSq	F	pValue	mice	sessions
0.0533831	2	0.0266916	17.1723	1.35841e-05	6	3
0.0435215	28	0.00155434	1	0.5
Bonferroni post test		p value
run	rest	0.00682577
run	net	0.00158524
rest	net	0.00167032
E, Pupil D/Dt - Repeated Measures Anova
SumSq	DF	MeanSq	F	pValue	mice	sessions
1.0305e-05	2	5.15248e-06	34.1785	3.06085e-08	6	3
4.22106e-06	28	1.50752e-07	1	0.5
Bonferroni post test		p value
run	rest	0.00159468
run	net	2.53173e-05
rest	net	0.000532117

## Sheet: Figure 4
B, Orthogonal pairs - Wilcoxon test - Shuffled vs real - baseline
Signedrank	p	mice
45	0.00390625	9

## Sheet: Figure 5
A, Tests against shuffled Data are done individually for every cell
C, Tests against suffled Data are done individually for every cell
F, Chi^2 for number of PCs and SCs
Source	df	Chi^2	p
Groups	2	14.9981	0.000554
Individual p-values
Ind p	base	cue
PC	0.000198	0.000198
SC	0.244	0.244
Other	0.0224	0.0224

## Sheet: Fig. 5 - Suppl 5
A, 2 way Anova mean event frequency
Source	SS	df	MS	F	Prob>F	n
Columns	1.25581	1	1.25581	1.70794	0.200567	9
Rows	1.32166	1	1.32166	1.7975	0.189455
Interaction	0.148342	1	0.148342	0.20175	0.656339
Error	23.5288	32	0.735275
Total	26.2546	35
B, 2 way Anova mean event amplitude
Source	SS	df	MS	F	Prob>F	n
Columns	0.0221846	1	0.0221846	1.67165	0.205295	9
Rows	7.18969e-06	1	7.18969e-06	0.000541754	0.981575
Interaction	0.0050628	1	0.0050628	0.38149	0.541178
Error	0.424676	32	0.0132711
Total	0.451931	35
D, 2 way Anova net occurence run vs rest, base vs cue
Source	SS	df	MS	F	Prob>F	n
Columns	21560	1	21560	20.0572	8.97991e-05	9
Rows	371.633	1	371.633	0.345729	0.560668
Interaction	66.6944	1	66.6944	0.0620457	0.804883
Error	34397.6	32	1074.93
Total	56396	35
G, 2 way Anova variance bulk run vs rest, base vs cue
Source	SS	df	MS	F	Prob>F	n
Columns	0.00649454	3	0.00216485	1.36918	0.320106	4
Rows	4.16252e-05	1	4.16252e-05	0.0263263	0.875129
Interaction	0.000720771	3	0.000240257	0.151953	0.925524
Error	0.012649	8	0.00158113
Total	0.0199059	15
H, 2 way Anova mean bulk run vs rest, base vs cue
Source	SS	df	MS	F	Prob>F	n
Columns	0.0272068	3	0.00906893	0.294212	0.828668	4
Rows	0.00554397	1	0.00554397	0.179856	0.682671
Interaction	0.0403122	3	0.0134374	0.435932	0.733331
Error	0.246596	8	0.0308245
Total	0.319659	15
I, individual x-correlations of MPP and GC signals
Mouse	resting				run
	F	p	max	lag/s	F	p	max	lag/s
M224	13.2685	9.82741e-09	0.13483	0.0665253	15.3807	1.8778e-07	0.176945	3.99152
M227	31.6602	4.6193e-17	0.169201	0.200309	4.57888	0.0278128	0.118294	2.93787
M234	22.3705	4.6193e-17	0.0923179	0.0667797	1.795	0.150095	0.0253635	-1.20203

## Sheet: Figure 6
Two-way ANOVA, network frequency run vs rest, baseline vs cue-enriched
Source	Sum Sq.	d.f.	Singular?	Mean Sq.	F	Prob>F	mice
base vs cue	3.20585	1	0	3.20585	0.705578	0.407348	9
run vs rest	59.1322	1	0	59.1322	13.0144	0.00107267
Error	140.851	31	0	4.54358
Total	203.189	33	0
post tests bonferroni corrected
base vs cue=baseline,run vs rest=run	base vs cue=cue,run vs rest=run	1
base vs cue=baseline,run vs rest=run	base vs cue=baseline,run vs rest=rest	0.00643602
base vs cue=baseline,run vs rest=run	base vs cue=cue,run vs rest=rest	0.0219993
base vs cue=cue,run vs rest=run	base vs cue=baseline,run vs rest=rest	0.35847
base vs cue=cue,run vs rest=run	base vs cue=cue,run vs rest=rest	0.00643602
base vs cue=baseline,run vs rest=rest	base vs cue=cue,run vs rest=rest	1
A, Kruskal Wallis network size
Source	SS	df	MS	Chi-sq	Prob>Chi-sq	n (NE)	mice
Groups	1.1777e+08	1	1.1777e+08	180.598	3.58763e-41	2806	9
Error	1.71205e+09	2805	610356
B, Kruskal Wallis network events per cell
Source	SS	df	MS	Chi-sq	Prob>Chi-sq	n (cells)	mice
Groups	1.325e+09	1	1.325e+09	178.605	9.77127e-41	9435	9
Error	6.86696e+10	9434	7.27894e+06
Kruskal Wallis for number of orthogonal networks
Source	SS	df	MS	Chi-sq	Prob>Chi-sq	mice
Groups	10.5625	1	10.5625	0.466679	0.494519	9
Error	328.938	14	23.4955
Chi^2 for number of PCs and SCs, basline vs cue-enriched
Source	df	Chi^2	p	mice
Groups	2	14.9981	0.00055362	9
individual p values with Bonferroni correction
Ind p	base vs cue
PC	0.000198041
SC	0.244168
Other	0.0224117
C, chi^2 test for number of network participating feature cells
Source	df	Chi^2	p
Groups	3	18.8782	0.000289717
individual p values with Bonferroni correction
Ind p	base vs cue
PCnet	1.26271e-05
PC	0.0902212
SC net	0.220119
SC	0.0091591
Kruskal Wallis test for cluster size
Source	SS	df	MS	Chi-sq	Prob>Chi-sq	mice
Groups	4393.77	1	4393.77	2.34391	0.125774	9
Error	276788	149	1857.64
Total	281182	150
D, chi^2 test for number of feature clusters
Source	df	Chi^2	p	mice
Groups	3	13.0518	0.00452581	9
individual p values
Ind p	base vs cue
plc	0.0044321
sp & plc	0.0401687
sp	0.591491
none	0.00486319

[truncated: 6 more sheets: Figure 7, Fig. 7 - Suppl. 2, Figure 8, Fig. 8 - Suppl. 1, Fig. 8 - Suppl. 2, Fig. 8 - Suppl. 3]
